# Supplementary material for: Synthesis and structural characterization of mixed halide–N,N-diethylcarbamates of group 4 metals, including a case of unusual tetrahydrofuran activation
Source: Royal Society of Chemistry journal article supplement (doi:10.1039/c6nj03489f), 2017-01-01

# Synthesis and Structural Characterization of Mixed Halide - *N,N*-Diethylcarbamates of Group 4 Metals, Including a Case of Unusual Tetrahydrofuran Activation

*Marco Bortoluzzi, Giulio Bresciani, Fabio Marchetti, Guido Pampaloni  
and Stefano Zacchini*

## Supporting Information

|                                                                                                                           |         |
|---------------------------------------------------------------------------------------------------------------------------|---------|
| <b>Figure S1.</b> ORTEP drawing of <b>3</b>                                                                               | Page S2 |
| <b>Table S1.</b> Selected bond lengths (Å) and angles (deg) in <b>3</b>                                                   | Page S3 |
| <b>Table S2.</b> Hydrogen bonds in <b>3</b> (Å and deg)                                                                   | Page S3 |
| <b>Figure S2.</b> <sup>13</sup> C NMR spectrum (CD <sub>2</sub> Cl <sub>2</sub> ) of <b>2</b>                             | Page S4 |
| <b>Figure S3.</b> <sup>13</sup> C NMR spectrum (CDCl <sub>3</sub> ) of Ti(O <sub>2</sub> CNEt <sub>2</sub> ) <sub>4</sub> | Page S4 |
| <b>Figure S4.</b> <sup>13</sup> C NMR spectrum (CD <sub>2</sub> Cl <sub>2</sub> ) of <b>6</b>                             | Page S5 |
| <b>Figure S5.</b> <sup>13</sup> C NMR spectrum (CD <sub>2</sub> Cl <sub>2</sub> ) of <b>7</b>                             | Page S5 |

**Figure S1.** ORTEP drawing of  $[\text{TMGH}]_6[\text{TiCl}_6]\text{Cl}_4 \cdot 2\text{MeCN}$ , **3**, with key atoms labelled. Displacement ellipsoids are at the 50 % probability level. The asymmetric unit of the unit cell is represented which contains: half of a  $[\text{TiCl}_6]^{2-}$  anion (the whole anion is represented), two  $\text{Cl}^-$  anions, one MeCN molecule. Symmetry transformations used to generate equivalent atoms:  $-x+1, -y, -z+1$

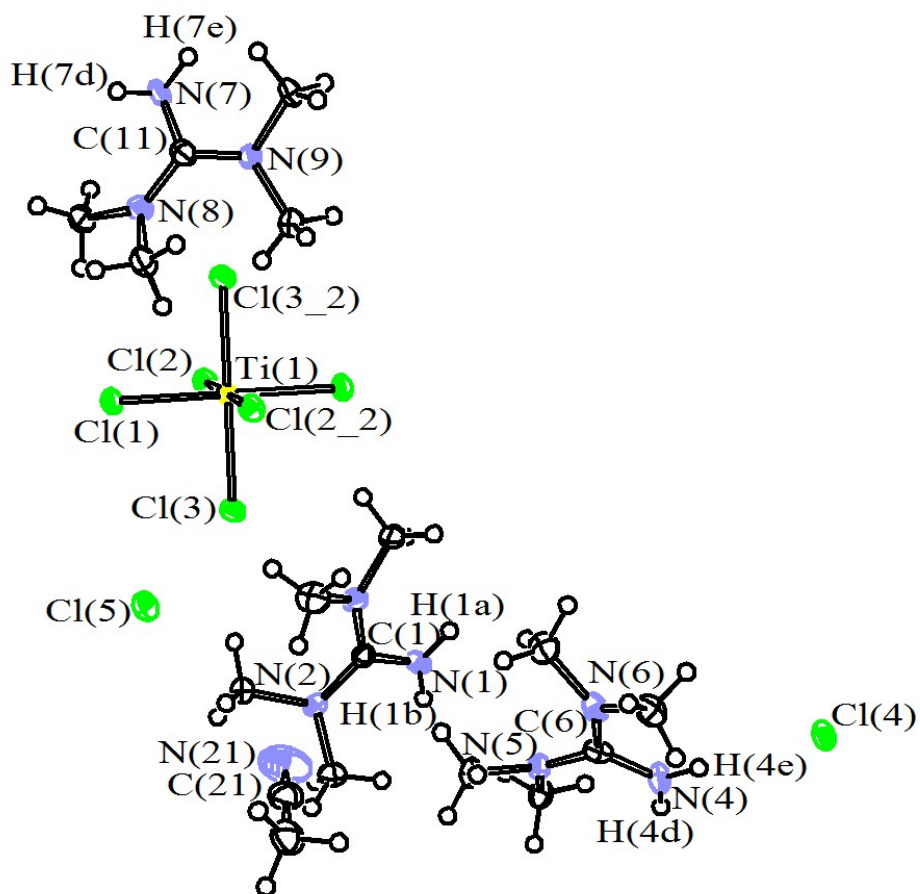

**Table S1**

|                 |            |                 |            |
|-----------------|------------|-----------------|------------|
| Ti(1)–Cl(1)     | 2.3409(17) | Ti(1)–Cl(2)     | 2.3546(17) |
| Ti(1)–Cl(3)     | 2.3348(18) | C(1)–N(1)       | 1.318(9)   |
| C(1)–N(2)       | 1.353(10)  | C(1)–N(3)       | 1.333(9)   |
| C(6)–N(4)       | 1.329(10)  | C(6)–N(5)       | 1.340(9)   |
| C(6)–N(6)       | 1.352(9)   | C(11)–N(7)      | 1.334(10)  |
| C(11)–N(8)      | 1.333(9)   | C(11)–N(9)      | 1.345(9)   |
|                 |            |                 |            |
| N(1)–C(1)–N(2)  | 119.5(7)   | N(1)–C(1)–N(3)  | 120.0(7)   |
| N(2)–C(1)–N(3)  | 120.5(6)   | N(4)–C(6)–N(5)  | 121.4(7)   |
| N(4)–C(6)–N(6)  | 119.6(6)   | N(5)–C(6)–N(6)  | 119.0(7)   |
| N(7)–C(11)–N(8) | 119.1(7)   | N(7)–C(11)–N(9) | 120.0(7)   |
| N(8)–C(11)–N(9) | 120.9(7)   |                 |            |

**Table S2**

| <b>D–H···A</b>       | <b>d(D–H)</b> | <b>d(H···A)</b> | <b>d(D···A)</b> | <b>&lt;(DHA)</b> |
|----------------------|---------------|-----------------|-----------------|------------------|
| N(1)–H(1A)···Cl(5)#2 | 0.88          | 2.35            | 3.205(6)        | 162.7            |
| N(1)–H(1B)···Cl(4)#3 | 0.88          | 2.47            | 3.220(6)        | 143.7            |
| N(4)–H(4E)···Cl(4)   | 0.88          | 2.44            | 3.267(6)        | 157.6            |
| N(4)–H(4D)···Cl(5)#4 | 0.88          | 2.33            | 3.186(7)        | 163.0            |
| N(7)–H(7D)···Cl(4)#5 | 0.88          | 2.49            | 3.290(6)        | 151.2            |
| N(7)–H(7E)···Cl(5)#6 | 0.88          | 2.42            | 3.238(6)        | 155.5            |

Symmetry transformations used to generate equivalent atoms:

#1  $-x+1, -y, -z+1$  #2  $-x+1, -y+1, -z+1$  #3  $-x+1, -y+1, -z+2$

#4  $x, y, z+1$  #5  $x, y-1, z-1$  #6  $x+1, y-1, z$

**Figure S2.**  $^{13}\text{C}$  NMR spectrum ( $\text{CD}_2\text{Cl}_2$ ) of **2**

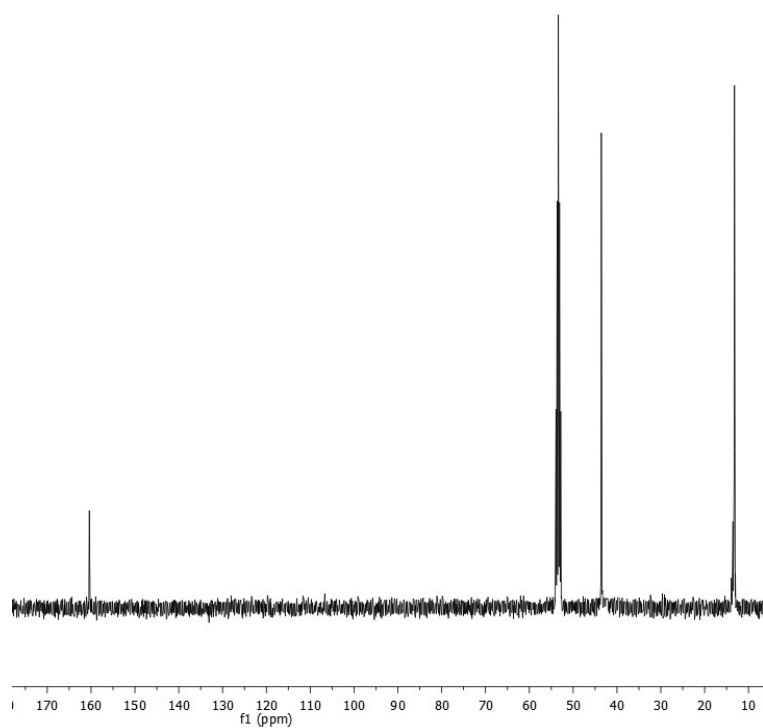

**Figure S3.**  $^{13}\text{C}$  NMR spectrum ( $\text{CDCl}_3$ ) of  $\text{Ti}(\text{O}_2\text{CNet}_2)_4$

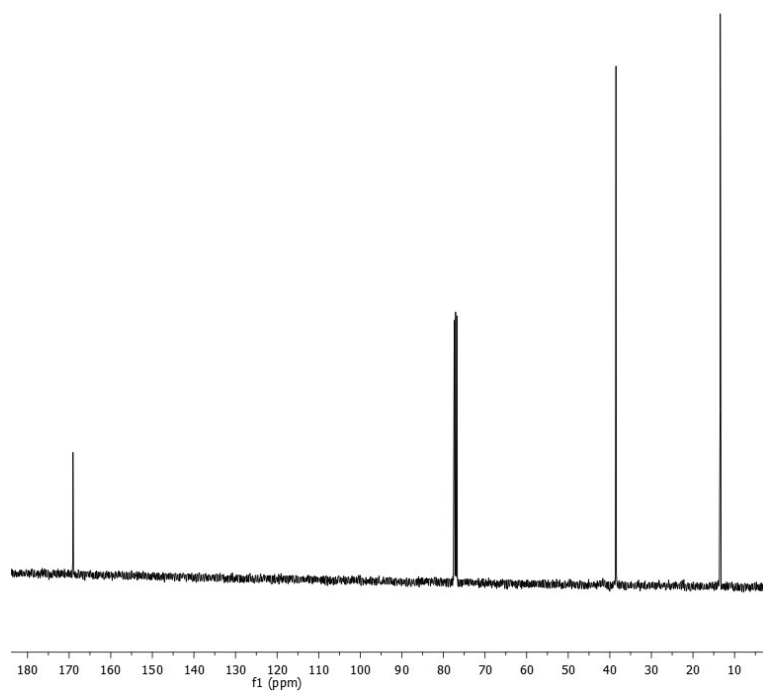

**Figure S4.**  $^{13}\text{C}$  NMR spectrum ( $\text{CD}_2\text{Cl}_2$ ) of **6**

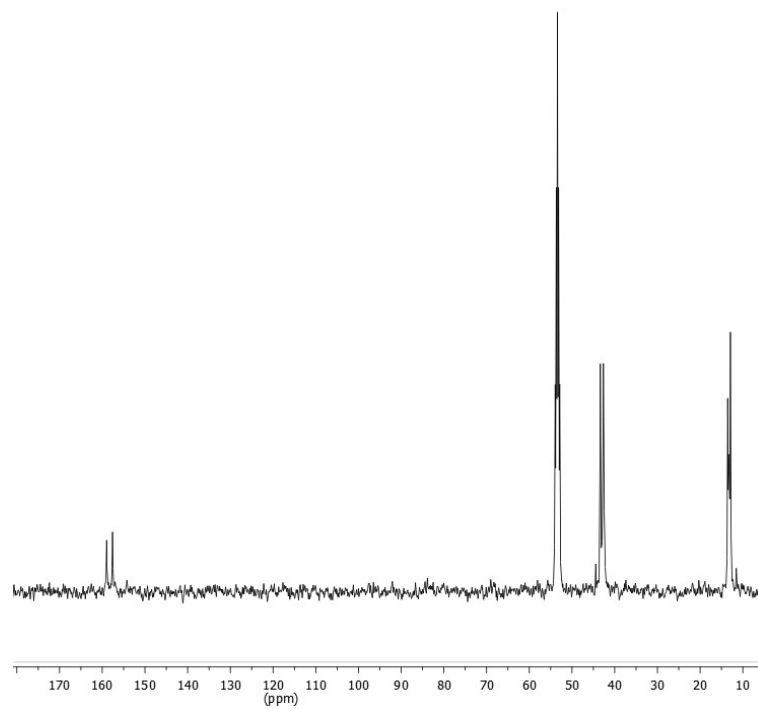

**Figure S5.**  $^{13}\text{C}$  NMR spectrum ( $\text{CD}_2\text{Cl}_2$ ) of **7**

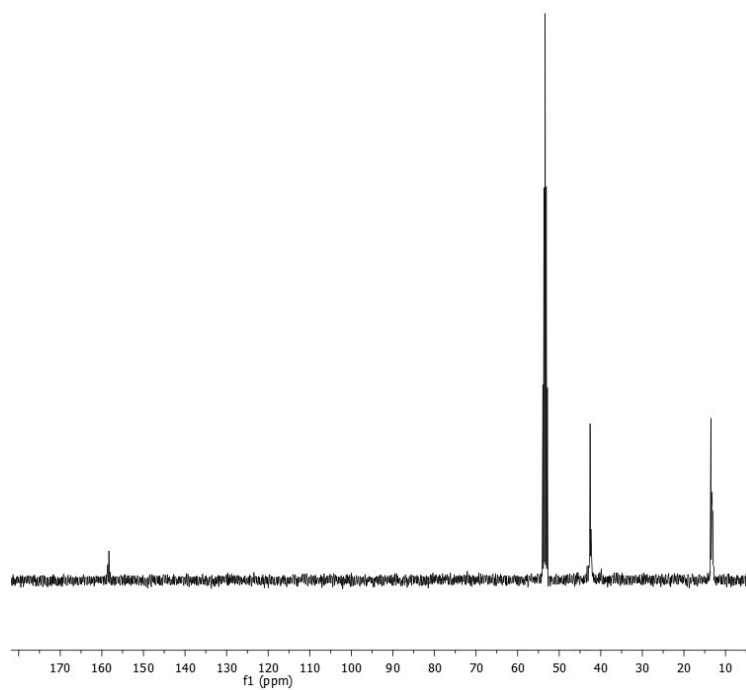

Supplement: c6nj03489f1.pdf [file c6nj03489f1.pdf]
